# Supplementary material for: Effects of Myofascial Release Techniques on Joint Range of Motion of Athletes: A Systematic Review and Meta-Analysis of Randomized Controlled Trials
Source: MDPI journal article supplement (doi:10.3390/sports12050132), 2024-05-14
Supplement: s1 [file s1]

**Table S1.** Coding strategy and lines of code used in databases.

| Databases                               | Keywords                                                                                                                                                                                                                                                                                                                                                                                                                                   | Number of Articles Accessed | Search Restriction Criteria |
|-----------------------------------------|--------------------------------------------------------------------------------------------------------------------------------------------------------------------------------------------------------------------------------------------------------------------------------------------------------------------------------------------------------------------------------------------------------------------------------------------|-----------------------------|-----------------------------|
| <b>Pubmed</b>                           | (Myofascial release [MeSH Terms] OR Myofascial Release Therapies OR Therapy, Myofascial Release OR- Myofascial Release Treatments OR Treatment, Myofascial Release OR Myofascial Treatments OR Treatment, Myofascial)<br>AND<br>(range of motion[title] OR Joint ROM OR flexibility OR passive range of motion OR active range of motion)<br>AND<br>(Athletes OR Professional Athletes [MeSH Terms] OR Elite Athletes OR College Athletes) | 34                          | Title/abstract              |
| <b>Science Direct</b>                   | "Myofascial release" OR "Myofascial Release Therapies", Myofascial, "Myofascial Release" OR "Myofascial Treatments") AND ("range of motion" OR "Joint ROM" OR flexibility) AND (Athletes OR "Professional Athletes"                                                                                                                                                                                                                        | 237                         | Research articles           |
| <b>Web of Science</b>                   | "Myofascial release" OR "Myofascial Release Therapies", Myofascial, "Myofascial Release" OR "Myofascial Treatments") AND ("range of motion" OR "Joint ROM" OR flexibility) AND (Athletes OR "Professional Athletes"                                                                                                                                                                                                                        | 45                          | Topic                       |
| <b>Scopus</b>                           | "Myofascial release" OR "Myofascial Release Therapies", Myofascial, "Myofascial Release" OR "Myofascial Treatments") AND ("range of motion" OR "Joint ROM" OR flexibility) AND (Athletes OR "Professional Athletes"                                                                                                                                                                                                                        | 47                          | Title/abstract/keyword      |
| <b>Cochrane</b>                         | "Myofascial release" OR "Myofascial Release Therapies", Myofascial, "Myofascial Release" OR "Myofascial Treatments") AND ("range of motion" OR "Joint ROM" OR flexibility) AND (Athletes OR "Professional Athletes"                                                                                                                                                                                                                        | 48                          | Title/abstract/keyword      |
| <b>TOTAL NUMBER OF ARTICLE ACCESSED</b> |                                                                                                                                                                                                                                                                                                                                                                                                                                            | 411                         |                             |

**Table S2.** The potential moderators of this study and coding categories.

| Age                            | Gender         | Duration of intervention | Type of intervention                                                                                                                                                                                                 | Joint type                                   |
|--------------------------------|----------------|--------------------------|----------------------------------------------------------------------------------------------------------------------------------------------------------------------------------------------------------------------|----------------------------------------------|
| <25 years of age<br>≥25 of age | Male<br>Female | Acute<br>Long-term       | 1. Myofascial release methods (foam rolling // fascial manipulation // jogging + foam rolling // DN with water pressure massage—placebo laser with water pressure massage // self-myofascial release [foam rolling]) | Hip<br>Ankle<br>Knee<br>Cervical<br>Shoulder |
|                                |                |                          | 2. Instrumental methods (IASTM // dry needling)                                                                                                                                                                      |                                              |
|                                |                |                          | 3. Stretching technique methods (Contract-relax PNF stretching technique)                                                                                                                                            |                                              |
|                                |                |                          | 4. Other methods (local MTrPs therapy (myofascial trigger points) + PNF stretching technique)                                                                                                                        |                                              |

**Table S3.** Quality assessment (PEDro scale) of clinical trials included in the systematic review.

| Authors                     | 1* | 2 | 3 | 4 | 5 | 6 | 7 | 8 | 9 | 10 | 11 | Total PEDro score |
|-----------------------------|----|---|---|---|---|---|---|---|---|----|----|-------------------|
| Romero-Franco (2019)        | 1  | 1 | 1 | 0 | 1 | 1 | 0 | 1 | 1 | 1  | 1  | 8                 |
| Brandolini (2019)           | 1  | 1 | 1 | 0 | 0 | 0 | 1 | 1 | 1 | 1  | 1  | 7                 |
| Castellote-Caballero (2013) | 1  | 1 | 0 | 1 | 1 | 0 | 1 | 1 | 1 | 1  | 1  | 8                 |
| Guillot (2019)              | 1  | 1 | 1 | 0 | 0 | 1 | 0 | 1 | 1 | 1  | 1  | 7                 |
| Weber (2022)                | 1  | 1 | 1 | 1 | 0 | 0 | 1 | 1 | 1 | 1  | 1  | 8                 |
| Junker & Stöggli (2019)     | 1  | 1 | 1 | 0 | 0 | 0 | 0 | 1 | 1 | 1  | 1  | 6                 |
| Abo-EL-Roos (2020)          | 1  | 1 | 0 | 1 | 1 | 0 | 0 | 0 | 1 | 1  | 1  | 6                 |
| Ceballos-Laita (2021)       | 1  | 1 | 1 | 0 | 0 | 1 | 1 | 1 | 1 | 1  | 1  | 8                 |
| Haser (2017)                | 1  | 1 | 0 | 1 | 1 | 1 | 0 | 1 | 0 | 1  | 1  | 7                 |
| Shalamzari (2022)           | 1  | 1 | 0 | 0 | 1 | 1 | 0 | 1 | 0 | 1  | 1  | 6                 |

**Note 1.** 1: Yes, 0: No.

**Note 2.** \*: Criteria 1 does not contribute for the total score on the PEDro scale.

**Note 3.** Criteria 1: Eligibility criteria; Criteria 2: randomized allocation; Criteria 3: concealed allocation; Criteria 4: similar at baseline; Criteria 5: blinded subjects; Criteria 6: blinded therapists; Criteria 7: blinded assessors; Criteria 8: measures of at least one key outcome obtained for 85% of subjects; Criteria 9: intention-to-treat analysis; Criteria 10: between-group comparisons for at least one key outcome; Criteria 11: point and variability measures for at least one key outcome.

**Table S4.** Sensitivity analysis results for dependent effect size estimation with different RHO ( $\rho$ ) values.

|             | $\rho = 0$ | $\rho = 0.2$ | $\rho = 0.4$ | $\rho = 0.6$ | $\rho = 0.8$ | $\rho = 1$ |
|-------------|------------|--------------|--------------|--------------|--------------|------------|
| Coefficient | 0.53       | 0.53         | 0.53         | 0.53         | 0.53         | 0.53       |
| SE          | 0.15       | 0.15         | 0.15         | 0.15         | 0.15         | 0.15       |
| $\tau^2$    | 0.58       | 0.58         | 0.58         | 0.59         | 0.59         | 0.59       |

**Note.** SE: Standard error.

**Table S5.** Evaluation of certainty of evidence using the GRADE scale.

| Outputs                                    | Risk of bias    | Inconsistency   | Indirectness | Imprecision     | Publication bias | Certainty of evidence         |
|--------------------------------------------|-----------------|-----------------|--------------|-----------------|------------------|-------------------------------|
| Overall effect (ROM performance)           | Not significant | Not significant | Significant  | Not significant | Not significant  | ⊕⊕⊕○<br>Moderate <sup>a</sup> |
| Moderator analysis (age)                   | Not significant | Not significant | Significant  | Not significant | Not significant  | ⊕⊕⊕○<br>Moderate <sup>a</sup> |
| Moderator analysis (gender)                | Not significant | Not significant | Significant  | Not significant | Not significant  | ⊕⊕⊕○<br>Moderate <sup>a</sup> |
| Moderator analysis (intervention duration) | Not significant | Not significant | Significant  | Not significant | Not significant  | ⊕⊕⊕○<br>Moderate <sup>a</sup> |
| Moderator analysis (intervention type)     | Not significant | Not significant | Significant  | Not significant | Not significant  | ⊕⊕⊕○<br>Moderate <sup>a</sup> |
| Moderator analysis (joint type)            | Not significant | Not significant | Significant  | Not significant | Not significant  | ⊕⊕⊕○<br>Moderate <sup>a</sup> |

<sup>a</sup> Downgraded by one level because the study result contains a high degree of heterogeneity (>75%).

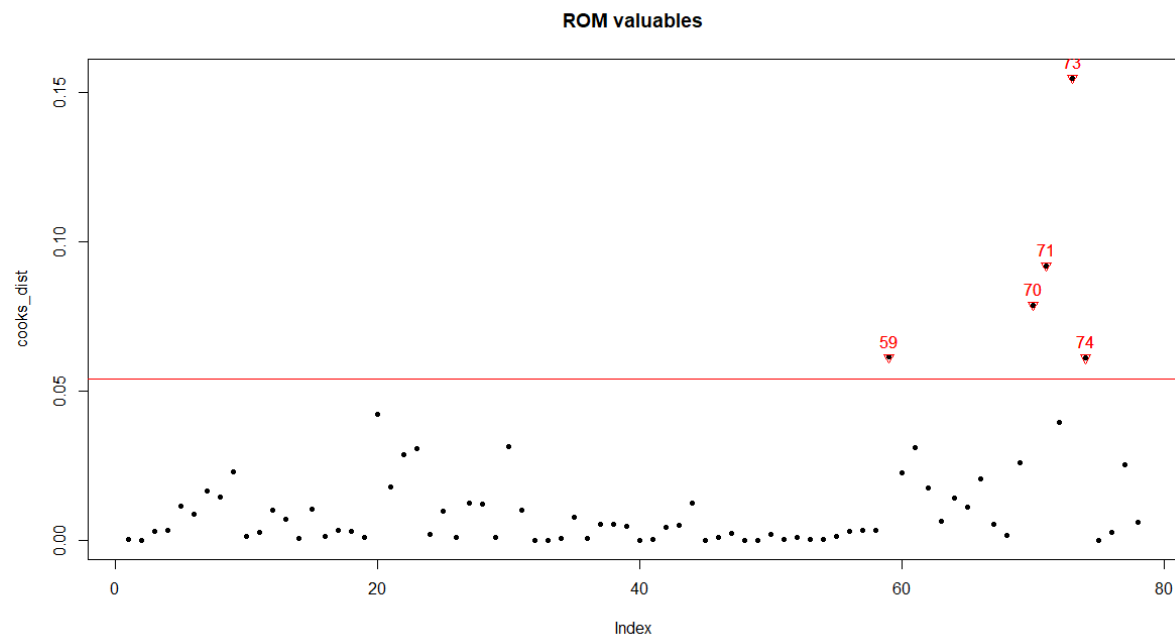

**Figure S1.** Identifying outliers using Cook's distance analysis.
